# Supplementary material
Source: PubMed Central journal article supplement (PMC4162160)

**The E3 deubiquitinase USP17 is a positive regulator of ROR $\gamma$ t in Th17 cells<sup>¶</sup>**

Lei Han<sup>1\*</sup>, Jing Yang<sup>2\*</sup>, Xiuwen Wang<sup>1</sup>, Qingsi Wu<sup>3</sup>, Shuying Yin<sup>2</sup>, Zhiyuan Li<sup>2</sup>, Jing Zhang<sup>2</sup>, Yue Xing<sup>2</sup>, Zuojia Chen<sup>2</sup>, Andy Tsun<sup>1</sup>, Dan Li<sup>1</sup>, Miranda Piccioni<sup>1</sup>, Yu Zhang<sup>4</sup>, Qiang Guo<sup>5</sup>, Lindi Jiang<sup>6</sup>, Liming Bao<sup>7</sup>, Ling Lv<sup>1#</sup> and Bin Li<sup>2#</sup>

From the <sup>1</sup>Division of Rheumatology, Huashan Hospital, Fudan University, No.12, Middle Wulumuqi Road, Shanghai, 200040, China.

<sup>2</sup>Key Laboratory of Molecular Virology & Immunology, Unit of Molecular Immunology, Institut Pasteur of Shanghai, Shanghai Institutes for Biological Sciences, Chinese Academy of Sciences, No.320, Yueyang Road, Shanghai, 200032, China.

<sup>3</sup>Department of Immunology, Anhui Medical University, Hefei, 230032, China.

<sup>4</sup>Department of Obstetrics and Gynecology, Renji Hospital, School of Medicine, Shanghai Jiao Tong University, Shanghai, 200127, China

<sup>5</sup>Department of Rheumatology, Renji Hospital, Medical School of Shanghai Jiao Tong University, No. 1630, Dongfang Road, Shanghai, 200127, China.

<sup>6</sup>Department of Rheumatology, Zhongshan Hospital, Fudan University, No.180, Fenglin Road, Shanghai, 200032, China.

<sup>7</sup>Department of Pathology, Dartmouth-Hitchcock Medical Center, Geisel School of Medicine, Dartmouth College One Medical Center Drive, Lebanon, NH 03756, USA

\*: These authors contributed equally to this work.

#: Co-corresponding authors

<sup>¶</sup>Running title: Identification of USP17 as a positive regulator of ROR $\gamma$ t

To whom correspondence may be addressed: Ling Lv, Division of Rheumatology, Huashan Hospital, Fudan University, No.12, Middle Wulumuqi Road, Shanghai, 200040, China. Email: [huashanlvling@sina.com](mailto:huashanlvling@sina.com); And Bin Li, Unit of Molecular Immunology, Institut Pasteur of Shanghai, Shanghai Institutes for Biological Sciences, Chinese Academy of Sciences, No.320, Yueyang Road, Shanghai, 200032, China; Tel: 86-21-5492-3091; Fax: 86-21-5492-0044; Email: [binli@sibs.ac.cn](mailto:binli@sibs.ac.cn).

## Figure legend

**Supplemental Figure 1. ROR $\gamma$ t is stably expressed in Flag-ROR $\gamma$ t-Jurkat T cells.** The expression of ROR $\gamma$ t in Flag-Jurkat and Flag-ROR $\gamma$ t-Jurkat was detected by anti-Flag M2 Antibody.

Supplemental Figure 1

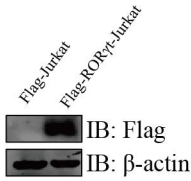

Supplement: supp_M114.565291_jbc.M114.565291-1.pdf [file supp_M114.565291_jbc.M114.565291-1.pdf]
